# Supplementary material for: High-throughput screening for efficient dual-atom catalysts in electrocatalytic nitrate reduction to ammonia via dissociation–association mechanism
Source: Royal Society of Chemistry journal article supplement (doi:10.1039/d3ta07167g), 2024-01-01
Supplement: d3ta07167g1.pdf [file d3ta07167g1.pdf]

## Supporting Information

### High-Throughput Screening for Efficient Dual-Atom Catalysts in Electrocatalytic Nitrate Reduction to Ammonia via Dissociation-Association Mechanism

*Lingling Lv,<sup>1, †</sup> Yanqing Shen,<sup>1,3, †, \*</sup> Min Zhou,<sup>1</sup> Yu Zhang,<sup>1</sup> Xianghui Meng,<sup>1</sup> Xin Yang,<sup>1</sup> Nan Zhang,<sup>1</sup> Kexin Wang,<sup>1</sup> Qirui He,<sup>1</sup> Dewei Gong,<sup>1,3</sup> Qing Ai,<sup>2, \*</sup> Yong Shuai,<sup>2, \*</sup> Zhongxiang Zhou<sup>1,3, \*</sup>*

1 School of Physics, Harbin Institute of Technology, Harbin 150001, PR China

2 School of Energy Science and Engineering, Harbin Institute of Technology, Harbin, 150001, PR China

3 Heilongjiang Provincial Key Laboratory of Plasma Physics and Application Technology, Harbin Institute of Technology, Harbin 150001, PR China

† Contributed equally to this work

\* Corresponding authors: Yanqing Shen. E-mail: [shenyanqing2004@163.com](mailto:shenyanqing2004@163.com)

Qing Ai, E-mail: [hitaiqing@hit.edu.cn](mailto:hitaiqing@hit.edu.cn)

Yong Shuai, E-mail: [shuaiyong@hit.edu.cn](mailto:shuaiyong@hit.edu.cn)

Zhongxiang Zhou. E-mail: [zhouzx@hit.edu.cn](mailto:zhouzx@hit.edu.cn)

## 1 COMPUTATIONAL METHOD

2 In the path of NO<sub>3</sub>RR to ammonia (NH<sub>3</sub>), 9 protons and 8 electrons are transferred.

3 The whole reaction can be summarized as NO<sub>3</sub><sup>-</sup>+9H<sup>+</sup>+8e<sup>-</sup> → NH<sub>3</sub>+3H<sub>2</sub>O [1]. Firstly,

4 nitrate will be adsorbed on M1M2/g-C<sub>3</sub>N<sub>4</sub>, the equation is as follows (In which \*

5 represents M1M2/g-C<sub>3</sub>N<sub>4</sub> substrates, \*NO<sub>3</sub> represents NO<sub>3</sub><sup>-</sup> adsorption on M1M2/g-

6 C<sub>3</sub>N<sub>4</sub> substrate, \*M represents the intermediate products M adsorption on M1M2/g-

7 C<sub>3</sub>N<sub>4</sub> substrate):

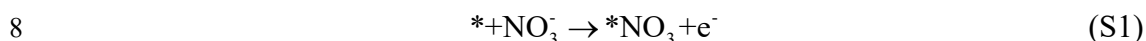

9 After the \*NO<sub>3</sub>, the first fork in the reaction path will appear, the \*NO<sub>3</sub>H (equation S2,

10 S3) or \*NO<sub>2</sub> (equation S4) will be generated:

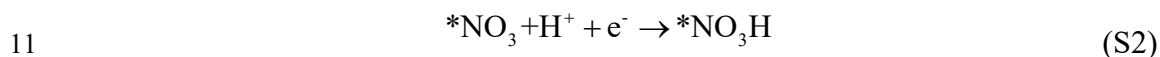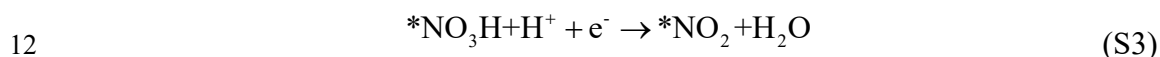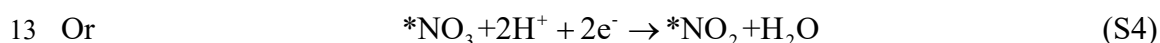

14 After the \*NO<sub>2</sub>, the second fork in the reaction path will appear, the \*NO<sub>2</sub>H (equation

15 S5, S6) or \*NO (equation S7) will be generated:

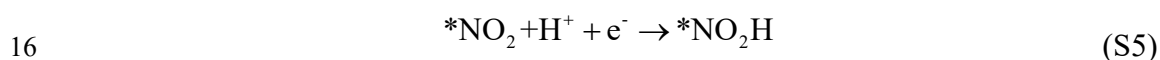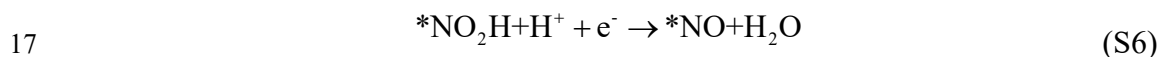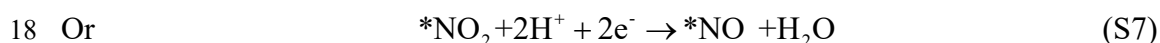

19 After the \*NO<sub>2</sub>, \*NOH will be generated:

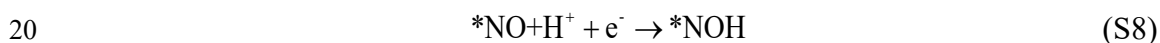

21 After the \*NOH, the third fork in the reaction path will appear, the \*NHOH (equation

22 S9) or \*N (equation S10) will be generated:

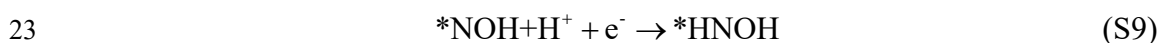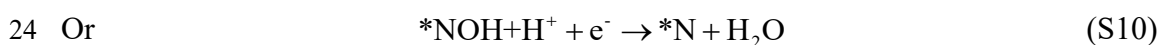

25 Whether for the \*NHOH (equation S11) or \*N (equation S12), the next step the \*NH

26 will be generated:

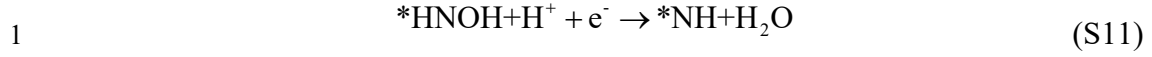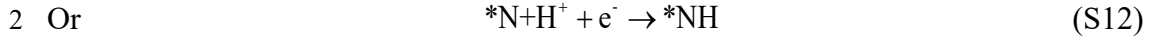

3 After  $*\text{NH}$ ,  $\text{NH}_3$  will be generated progressively:

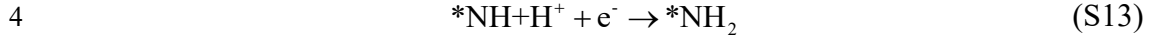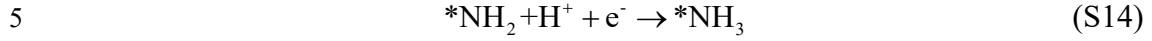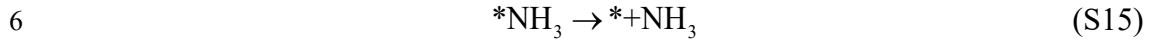

7

8 NO may be produced after the  $*\text{NO}$  of the reaction of  $\text{NO}_3\text{RR}$  to  $\text{NH}_3$ :

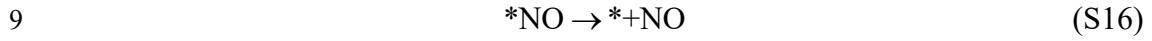

10 NO may be produced after the  $*\text{NO}_2$  of the reaction of  $\text{NO}_3\text{RR}$  to  $\text{NH}_3$ :

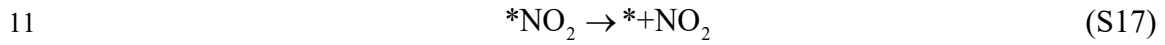

12  $\text{N}_2$  may be produced after the  $*\text{NO}$  of the reaction of  $\text{NO}_3\text{RR}$  to  $\text{NH}_3$ :

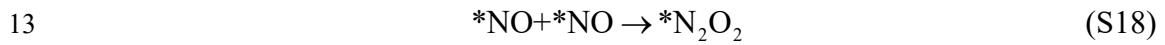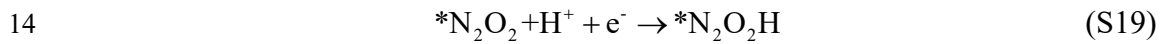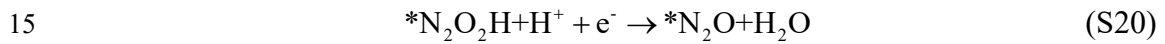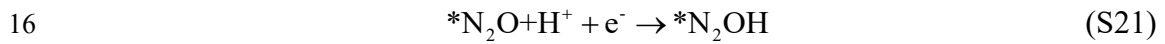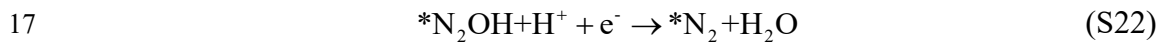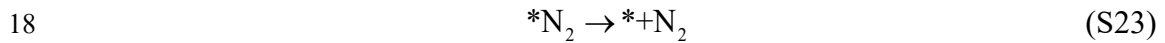

19  $\text{N}_2$  also may be produced after the  $*\text{N}$  of the reaction of  $\text{NO}_3\text{RR}$  to  $\text{NH}_3$ :

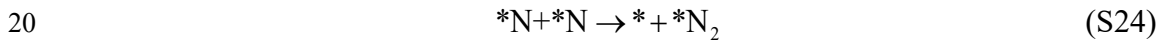

21

22 The potential limiting steps of the  $\text{NO}_3\text{RR}$  to  $\text{NH}_3$  reaction are

23  $*\text{NO} + \text{H}^+ + \text{e}^- \rightarrow *\text{NOH}$  and  $*\text{NH}_2 + \text{H}^+ + \text{e}^- \rightarrow *\text{NH}_3$ , which determine whether the

24 M1M2/g- $\text{C}_3\text{N}_4$  can perform the  $\text{NO}_3\text{RR}$  to  $\text{NH}_3$  reaction. Limiting potential required for

25 the reaction can be determined by calculating the Gibbs free energy in both steps:  $U_L =$

1  $-\Delta G_{\text{Max}}/e$ , in which  $\Delta G_{\text{Max}}$  is the maximum value for each order of free energy change.

2

3 The Gibbs free energy change  $\Delta G$  are calculated according to the computational  
4 hydrogen electrode (CHE) model proposed by Nørskov et al: [2]

$$5 \quad \Delta G = \Delta E + \Delta E_{\text{ZPE}} - T\Delta S + \Delta G_U \quad (\text{S25})$$

6 where  $\Delta E$  represents the change of total energy of the intermediate before and after  
7 adsorption,  $\Delta E_{\text{ZPE}}$  and  $T\Delta S$  are the zero-point energy difference and the entropy,  
8 respectively.  $\Delta G_U = -eU$  represents the influence of electrode potential on  $\Delta G$ .

9 The adsorption energy of  $\text{NO}_3^-$  on M1M2/g- $\text{C}_3\text{N}_4$  substrate is calculated with  
10  $\Delta G_{*\text{NO}_3} = G_{*\text{NO}_3} - G_* - G_{\text{HNO}_3(\text{g})} + 0.5G_{\text{H}_2(\text{g})} + \Delta G_{\text{correct}}$ , in which  $G_{*\text{NO}_3}$  and  $G_*$  represent the  
11 energy of M1M2/g- $\text{C}_3\text{N}_4$  with anchored  $\text{NO}_3^-$  and pure M1M2/g- $\text{C}_3\text{N}_4$ ,  $G_{\text{HNO}_3(\text{g})}$  and  
12  $G_{\text{H}_2(\text{g})}$  express the energy of  $\text{HNO}_3$  and  $\text{H}_2$  molecules in the gas phase,  $\Delta G_{\text{correct}} = 0.392$   
13 eV. [2]

14 The transition state is completed with the complete LST/QST method. The spin-  
15 polarized AIMD (ab initio molecular dynamic) simulation under a constant volume and  
16 temperature (NVT) ensemble are fulfilled using the Dmol3 package [3], and the initial  
17 temperature is set to 300 K and 800 K.

18 An implicit water solvent environment is simulated in the Dmol3 package, which  
19 includes certain the conductor-like screening model (COSMO) controls that can be used  
20 to simulate a solvent environment for the calculation [4,5]. Core electrons are processed  
21 with All Electrons and the double numerical plus polarization (DNP) is used as the basis  
22 set.  $3 \times 3 \times 1$  k-point grids, which the same as in the case of CASTEP, is selected. The

1 DFT-D and spin-polariton are also applied.

2 When calculating the Surface Pourbaix diagrams [6], the following hydrolysis  
3 reactions are taken into account:

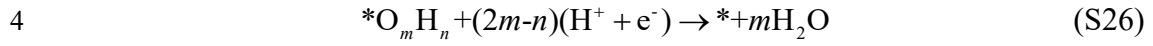

5 where  $m$  and  $n$  are the number of oxygen and hydrogen atoms of the adsorbate,  
6 respectively. The free energy changes involving electric potential and pH are calculated  
7 using:

$$8 \quad \Delta G = G_* + m G_{H_2O} - G_{*OmHn} - (2m-n)(0.5G_{H_2} - U_{SHE} - 2.303k_B T \text{pH}) \quad (S27)$$

9 where  $U_{SHE}$  is the potential relative to the standard hydrogen electrode (SHE),  $k_B$  is the  
10 Boltzmann constant ( $8.617343 \times 10^{-5} \text{ eV K}^{-1}$ ),  $T$  is the temperature.

11

## RESULTS AND DISCUSSIONS

Table S1. The formation energy  $E_f$  and dissolution potential  $U_{\text{diss}}$  of M1M2/g-C<sub>3</sub>N<sub>4</sub>

|      | $E_f$ | $U_{\text{diss}}^0$ (metal, bulk) | $N_e$ | $U_{\text{diss}}$ |
|------|-------|-----------------------------------|-------|-------------------|
| TiTi | -3.06 | -1.63                             | 2     | -0.10             |
| TiV  | -2.86 | -1.41                             | 2     | 0.03              |
| TiCr | -4.10 | -1.27                             | 2     | 0.78              |
| TiMn | -2.90 | -1.41                             | 2     | 0.04              |
| TiFe | -3.08 | -1.04                             | 2     | 0.50              |
| TiCo | -2.95 | -0.96                             | 2     | 0.52              |
| TiNi | -3.82 | -0.95                             | 2     | 0.96              |
| TiCu | -5.04 | -0.65                             | 2     | 1.87              |
| VV   | 0.36  | -1.18                             | 2     | -1.36             |
| VCr  | -3.23 | -1.04                             | 2     | 0.57              |
| VMn  | 0.54  | -1.19                             | 2     | -1.45             |
| VFe  | -1.82 | -0.82                             | 2     | 0.09              |
| VCo  | -2.06 | -0.73                             | 2     | 0.30              |
| VNi  | -3.40 | -0.72                             | 2     | 0.98              |
| VCu  | -3.91 | -0.42                             | 2     | 1.54              |
| CrCr | -4.01 | -0.91                             | 2     | 1.09              |
| CrMn | -3.04 | -1.05                             | 2     | 0.47              |
| CrFe | -3.09 | -0.68                             | 2     | 0.87              |
| CrCo | -3.32 | -0.60                             | 2     | 1.07              |

|      |       |       |   |       |
|------|-------|-------|---|-------|
| CrNi | -4.55 | -0.59 | 2 | 1.69  |
| CrCu | -4.45 | -0.29 | 2 | 1.94  |
| MnMn | 3.57  | -1.19 | 2 | -2.97 |
| MnFe | -1.28 | -0.82 | 2 | -0.18 |
| MnCo | -1.51 | -0.74 | 2 | 0.02  |
| MnNi | -3.16 | -0.73 | 2 | 0.86  |
| MnCu | -3.12 | -0.43 | 2 | 1.13  |
| FeFe | -1.23 | -0.45 | 2 | 0.17  |
| FeCo | -1.12 | -0.37 | 2 | 0.20  |
| FeNi | -1.99 | -0.36 | 2 | 0.64  |
| FeCu | -2.70 | -0.01 | 2 | 1.29  |
| CoCo | -0.62 | -0.28 | 2 | 0.03  |
| CoNi | -1.66 | -0.27 | 2 | 0.56  |
| CoCu | -2.12 | 0.03  | 2 | 1.09  |
| NiNi | -3.45 | -0.26 | 2 | 1.47  |
| NiCu | -2.65 | 0.04  | 2 | 1.37  |
| CuCu | -2.87 | 0.34  | 2 | 1.77  |

Table S2. The computation details for calculating the potential determining steps  $\Delta G^*_{\text{NO}^*-\text{NOH}}$ ,  $\Delta G^*_{\text{NH}_2^*-\text{NH}_3}$ , limiting potentials  $U_L$ ,  $G^*_{\text{NO}_3}$  and  $G^*_H$ .

|      | $\Delta G^*_{\text{NO}^*-\text{NOH}}$ | $\Delta G^*_{\text{NH}_2^*-\text{NH}_3}$ | $U_L$ (V) | $\Delta G^*_{\text{NO}_3}$ | $\Delta G^*_H$ |
|------|---------------------------------------|------------------------------------------|-----------|----------------------------|----------------|
| TiV  | 2.23                                  | 0.78                                     | -2.23     | -2.76                      | -0.85          |
| TiCr | 1.08                                  | 0.69                                     | -1.08     | -2.28                      | -1.28          |
| TiMn | 0.61                                  | 0.50                                     | -0.61     | -1.88                      | -0.44          |
| TiFe | 0.04                                  | 0.21                                     | -0.21     | -2.38                      | -0.77          |
| TiCo | 0.16                                  | 0.56                                     | -0.56     | -2.46                      | -0.78          |
| TiNi | 0.10                                  | 0.88                                     | -0.88     | -1.85                      | -0.76          |
| TiCu | 0.42                                  | -0.05                                    | -0.42     | -0.98                      | 0.23           |
| VCr  | 0.77                                  | 0.81                                     | -0.81     | -1.74                      | -1.04          |
| VFe  | 0.38                                  | 0.62                                     | -0.62     | -2.09                      | -0.80          |
| VCo  | 0.25                                  | 0.74                                     | -0.74     | -2.18                      | -0.66          |
| VNi  | 0.57                                  | 1.14                                     | -1.14     | -1.32                      | -0.80          |
| VCu  | 1.23                                  | 0.20                                     | -1.23     | -0.69                      | 0.06           |
| CrCr | 0.61                                  | 0.16                                     | -0.61     | -1.54                      | 0.06           |
| CrMn | 0.65                                  | 0.67                                     | -0.67     | -1.72                      | -1.17          |
| CrFe | 1.02                                  | 0.89                                     | -1.02     | -1.13                      | -1.10          |
| CrCo | 1.15                                  | 0.67                                     | -1.15     | -0.96                      | -0.83          |
| CrNi | 0.81                                  | 0.56                                     | -0.81     | -0.77                      | -1.10          |
| CrCu | 0.78                                  | 0.40                                     | -0.78     | -1.63                      | -1.14          |
| MnCo | 0.92                                  | 0.25                                     | -0.92     | -1.63                      | -0.65          |



|      |       |       |       |       |       |
|------|-------|-------|-------|-------|-------|
| MnNi | 0.68  | -0.34 | -0.68 | -0.35 | -0.54 |
| MnCu | -0.09 | 0.82  | -0.82 | -1.28 | -1.06 |
| FeFe | 0.77  | -0.25 | -0.77 | -1.80 | -0.70 |
| FeCo | 0.58  | 0.17  | -0.58 | -1.64 | -0.72 |
| FeNi | 0.54  | 0.20  | -0.54 | -1.22 | -0.64 |
| FeCu | 0.37  | 0.15  | -0.37 | -0.92 | -0.84 |
| CoCo | -0.15 | 0.75  | -0.75 | -1.67 | -1.44 |
| CoNi | 0.54  | 0.77  | -0.77 | -0.96 | -0.54 |
| CoCu | 0.69  | 0.59  | -0.69 | -1.04 | -1.24 |
| NiNi | 0.74  | -0.63 | -0.74 | 0.68  | -0.55 |
| NiCu | -0.21 | 0.32  | -0.32 | -0.86 | -0.75 |
| CuCu | 0.65  | 0.82  | -0.82 | -1.78 | -1.20 |

Table S3. The adsorption energies of nitrate on the 2O-end configurations: position 1, position 2, position 3 and the 1O-end configurations (position marked on red) of M1M2/g-C<sub>3</sub>N<sub>4</sub>, in which the red color represents the most stable adsorption configuration.

|      | 1- $\Delta G^*_{NO_3}$ | 2- $\Delta G^*_{NO_3}$ | 3- $\Delta G^*_{NO_3}$ | 1-O end-<br>$\Delta G^*_{NO_3}$ | $\Delta G^*_{NO_3}$ |
|------|------------------------|------------------------|------------------------|---------------------------------|---------------------|
| TiV  | -2.69                  | -1.93                  | <b>-2.76</b>           | -2.28                           | -2.76               |
| TiCr | -2.21                  | -1.62                  | <b>-2.28</b>           | -1.58                           | -2.28               |
| TiMn | <b>-1.88</b>           | -1.70                  | -1.65                  | -1.30                           | -1.88               |
| TiFe | -2.11                  | -1.83                  | <b>-2.38</b>           | -1.62                           | -2.38               |
| TiCo | -1.86                  | -2.05                  | <b>-2.46</b>           | -1.54                           | -2.46               |
| TiNi | -1.37                  | -1.57                  | <b>-1.85</b>           | -0.65                           | -1.85               |
| TiCu | -0.25                  | <b>-0.98</b>           | -0.11                  | 0.24                            | -0.98               |
| VCr  | <b>-1.74</b>           | -1.56                  | -1.64                  | -1.31                           | -1.74               |
| VFe  | -2.01                  | -1.89                  | <b>-2.09</b>           | -1.57                           | -2.09               |
| VCo  | -1.76                  | -1.74                  | <b>-2.18</b>           | -1.35                           | -2.18               |
| VNi  | -0.74                  | -0.98                  | <b>-1.32</b>           | -0.35                           | -1.32               |
| VCu  | -0.17                  | <b>-0.69</b>           | 0.06                   | 0.36                            | -0.69               |
| CrCr | -0.93                  | <b>-1.54</b>           | -1.04                  | -0.50                           | -1.54               |
| CrMn | -1.56                  | <b>-1.72</b>           | -1.47                  | -0.91                           | -1.72               |
| CrFe | <b>-1.13</b>           | -0.80                  | -1.06                  | -0.49                           | -1.13               |
| CrCo | -0.91                  | <b>-0.96</b>           | -0.85                  | -0.55                           | -0.96               |
| CrNi | 4.83                   | -0.40                  | <b>-0.77</b>           | -0.35                           | -0.77               |
| CrCu | -1.39                  | -0.94                  | <b>-1.63</b>           | -1.17                           | -1.63               |
| MnCo | -1.58                  | -0.65                  | <b>-1.63</b>           | -1.19                           | -1.63               |

|      |       |       |       |       |       |
|------|-------|-------|-------|-------|-------|
| MnNi | -0.35 | -0.08 | -0.33 | -0.32 | -0.35 |
| MnCu | -1.28 | -0.97 | -0.86 | -0.92 | -1.28 |
| FeFe | -1.80 | -1.13 | -1.75 | -1.36 | -1.80 |
| FeCo | -1.64 | -1.57 | -1.58 | -1.28 | -1.64 |
| FeNi | -1.10 | -0.62 | -1.22 | -0.77 | -1.22 |
| FeCu | -0.89 | -0.80 | -0.92 | -0.66 | -0.92 |
| CoCo | -1.67 | -0.49 | 3.99  | 4.22  | -1.67 |
| CoNi | -0.96 | -0.55 | -0.55 | 5.01  | -0.96 |
| CoCu | -0.95 | -0.55 | -1.04 | -0.62 | -1.04 |
| NiNi | 0.68  | 1.27  | 0.92  | 1.64  | 0.68  |
| NiCu | -0.73 | -0.86 | 5.40  | 4.69  | -0.86 |
| CuCu | -0.76 | -0.47 | -1.78 | -0.10 | -1.78 |

Table S4. Comparisons of Gibbs free energies for the potential-determining steps without and with solvation for TiFe/g-C<sub>3</sub>N<sub>4</sub>, FeCu/g-C<sub>3</sub>N<sub>4</sub> and NiCu/g-C<sub>3</sub>N<sub>4</sub>.

|      | $\Delta G^*NO^*NOH$<br>(without sol) | $\Delta G^*NO^*NOH$<br>(with sol) | $\Delta G^*NH_2^*NH_3$<br>(without sol) | $\Delta G^*NH_2^*NH_3$<br>(with sol) |
|------|--------------------------------------|-----------------------------------|-----------------------------------------|--------------------------------------|
| TiFe | 0.04                                 | 0.004                             | 0.21                                    | -0.30                                |
| FeCu | 0.37                                 | 0.47                              | 0.15                                    | -0.10                                |
| NiCu | -0.21                                | -0.21                             | 0.32                                    | 0.36                                 |

Table S5. The catalytic performance of TiFe/g-C<sub>3</sub>N<sub>4</sub> catalysts with different N atomic number coordination are also considered. By changing the number of N atoms around TiFe bimetallic atoms, the regulatory effect of microenvironment changes on the catalytic performance of TiFe/g-C<sub>3</sub>N<sub>4</sub> dual atom catalysts are explored. From the table below, it can be seen that TiFe/g-C<sub>3</sub>N<sub>4</sub> catalyst with 6 N atom number coordination shows the best catalytic performance (0.21 eV). As the number of N atoms gradually decreases, the stronger its adsorption effect on nitrate (TiFe-5N/g-C<sub>3</sub>N<sub>4</sub>: -2.59 eV; TiFe-5N/g-C<sub>3</sub>N<sub>4</sub>: -2.72 eV), the greater the Gibbs free energy of its potential determining step (TiFe-5N/g-C<sub>3</sub>N<sub>4</sub>: 0.80 eV; TiFe-4N/g-C<sub>3</sub>N<sub>4</sub>: 0.88 eV), which means that its catalytic performance is getting worse and worse.

|         | $\Delta G^*NO_3$ | $\Delta G^*NO^*NOH$ | $\Delta G^*NH_2^*NH_3$ |
|---------|------------------|---------------------|------------------------|
| TiFe-6N | -2.38            | 0.04                | 0.21                   |
| TiFe-5N | -2.59            | 0.71                | 0.80                   |
| TiFe-4N | -2.72            | 0.88                | 0.24                   |

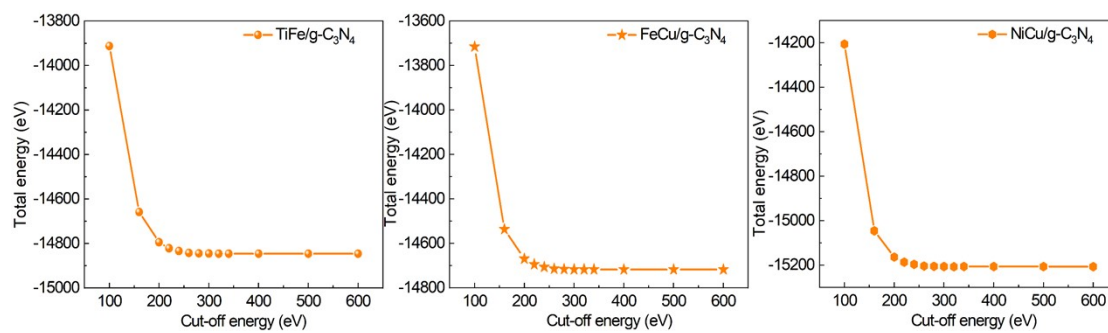

Figure S1 In order to select a suitable cut-off energy, convergence tests for TiFe/g-C<sub>3</sub>N<sub>4</sub>, FeCu/g-C<sub>3</sub>N<sub>4</sub> and NiCu/g-C<sub>3</sub>N<sub>4</sub> are performed.

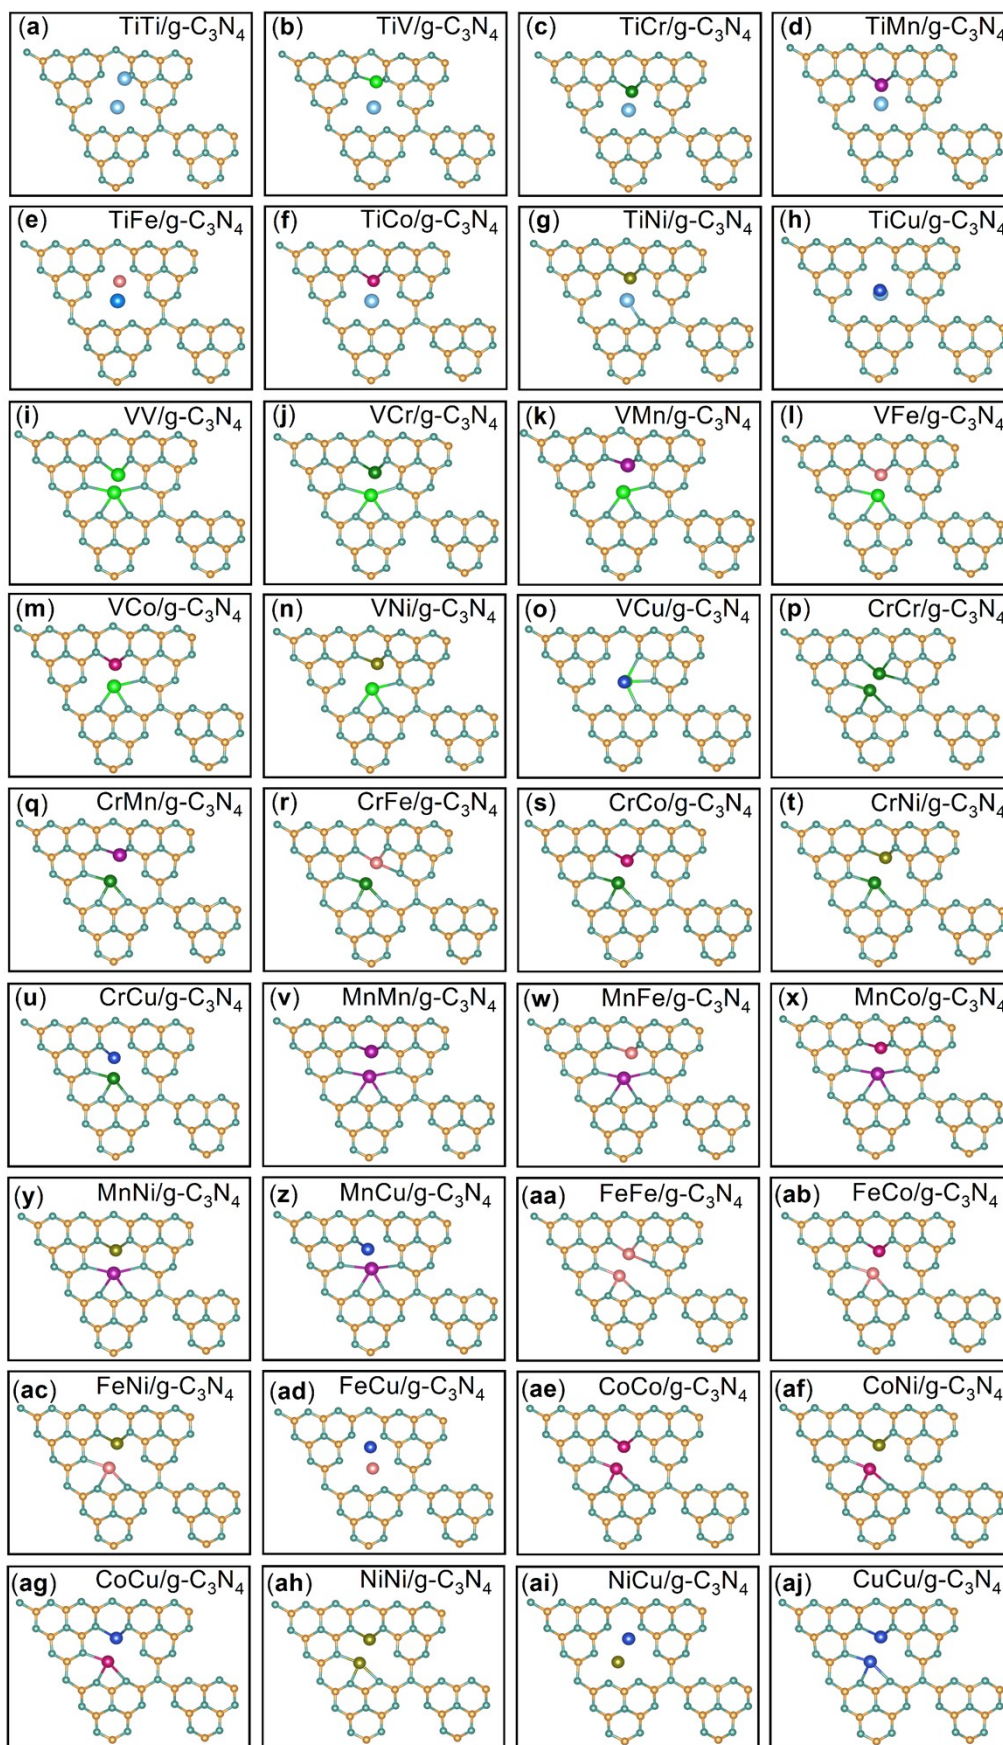

Figure S2 The optimized models of MIM2/g-C<sub>3</sub>N<sub>4</sub>.



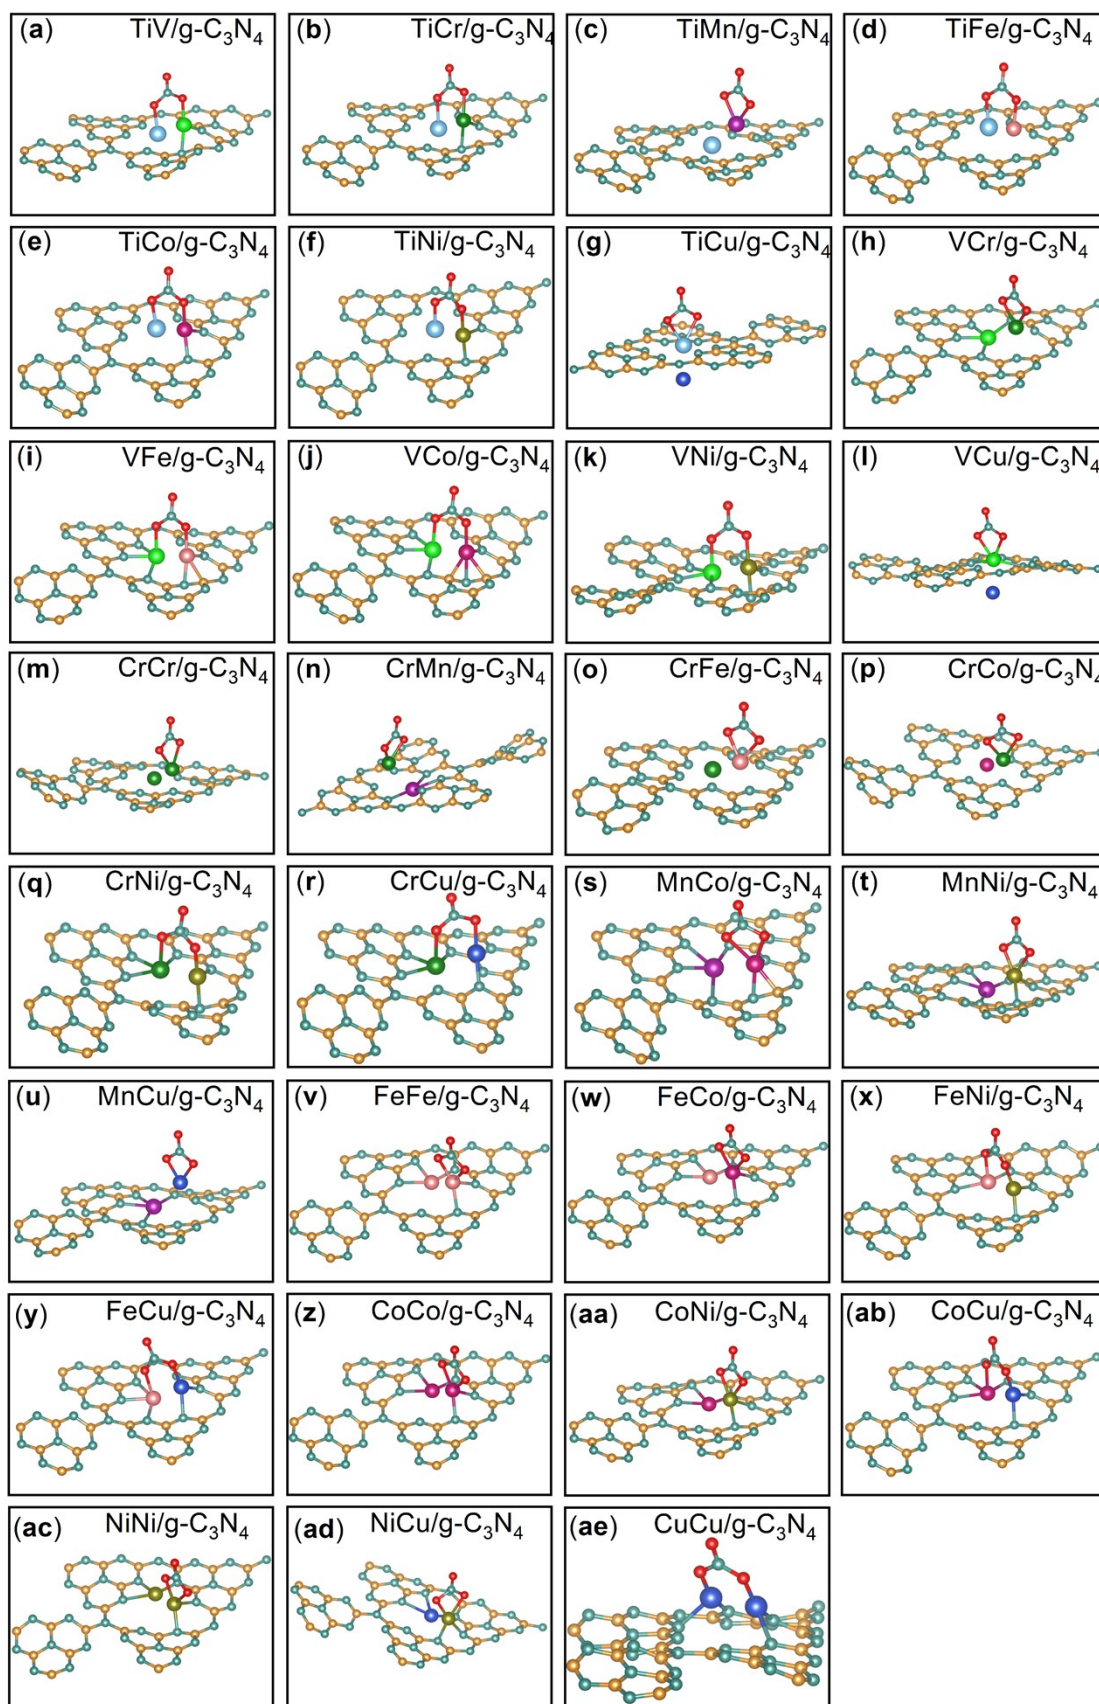

Figure S3 The optimized models of nitrate adsorption on M1M2/g-C<sub>3</sub>N<sub>4</sub>.

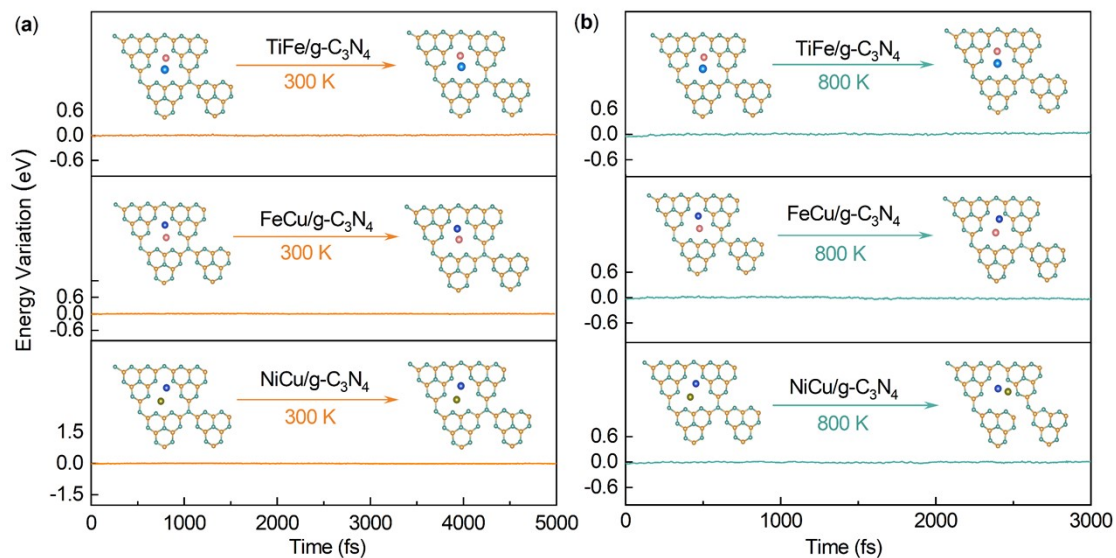

Figure S4. The AIMD of TiFe/g-C<sub>3</sub>N<sub>4</sub>, FeCu/g-C<sub>3</sub>N<sub>4</sub> and NiCu/g-C<sub>3</sub>N<sub>4</sub> in temperature of a) 300 K and b) 800 K.

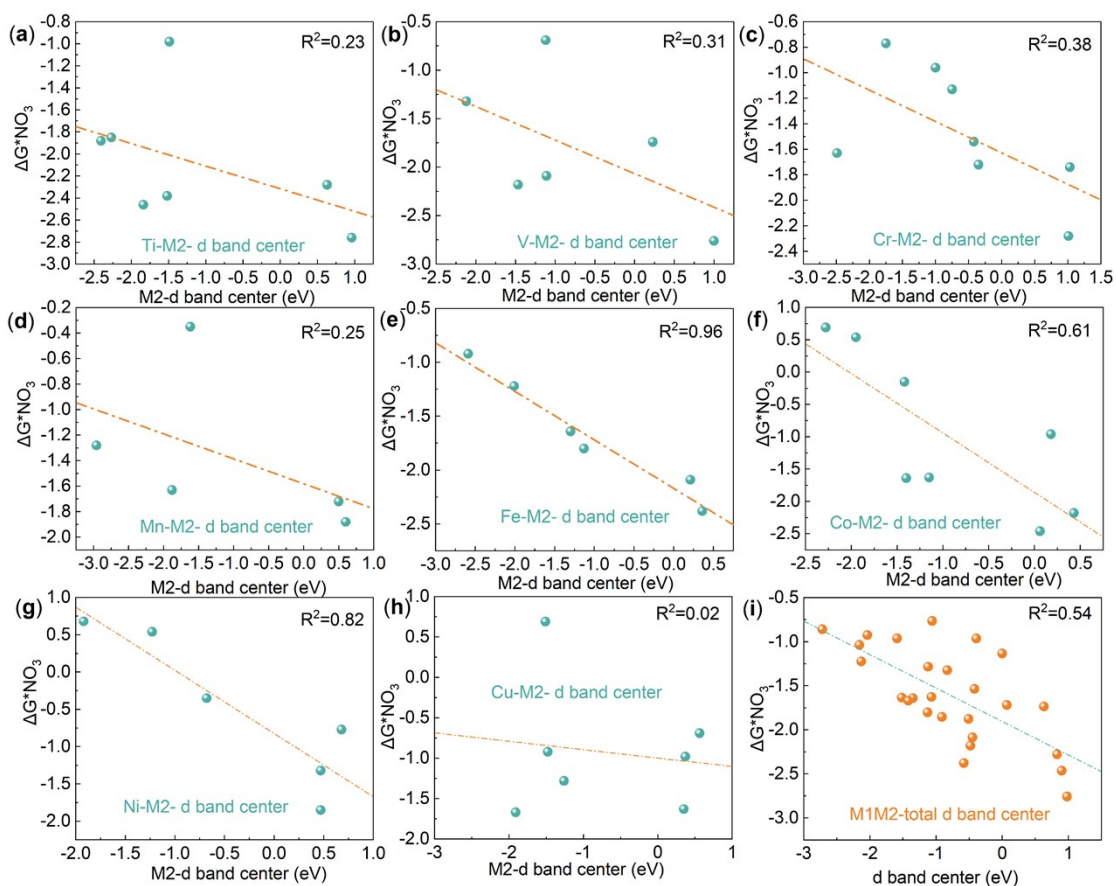

Figure S5. (a)-(h) The relationship of d-band centers of M2 single atom and  $\Delta G^*NO_3$ , (i) The relationship of d-band centers of M1M2 dual-atoms and  $\Delta G^*NO_3$ .



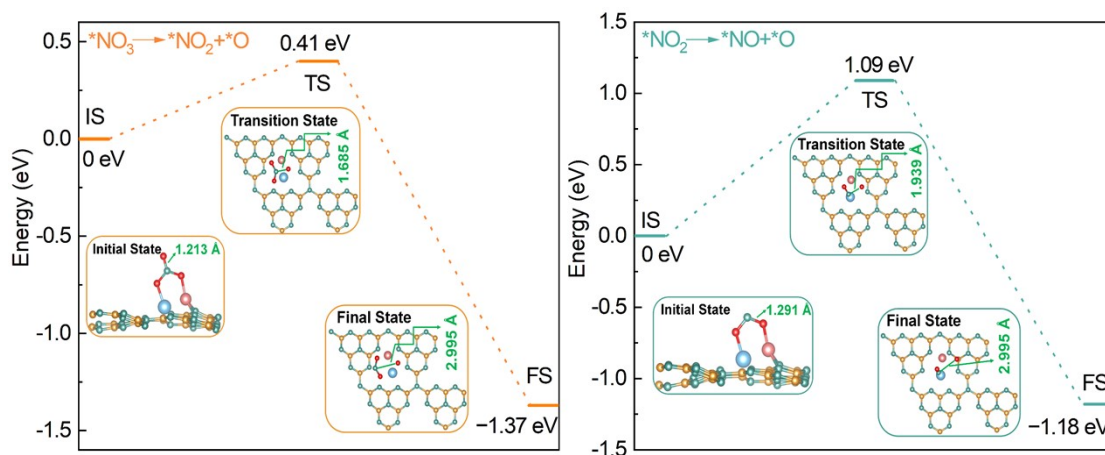

Figure S6. The transition states for TiFe/g-C<sub>3</sub>N<sub>4</sub> to perform  $*NO_3 \rightarrow *NO_2 + *O$  and  $*NO_2 \rightarrow *NO + *O$  dissociation reaction.

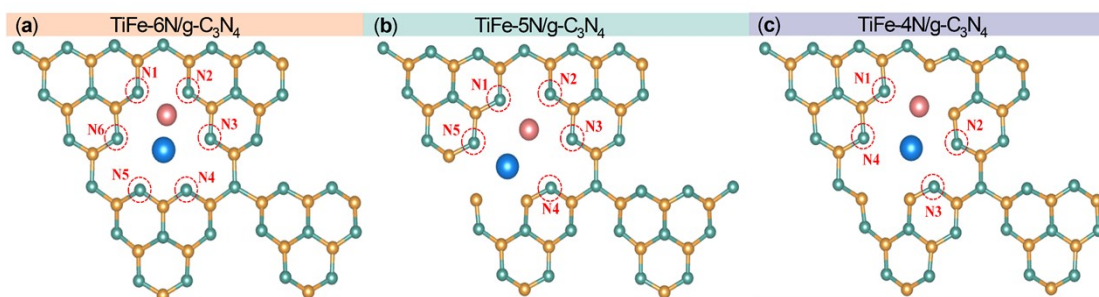

Figure S7. Optimized structure of TiFe coordinated with different N atomic numbers. a) 6 N atoms, b) 5 N atoms and c) 4 N atoms.

## REFERENCE

---

- [1] Wang, Y.; Yu, Y.; Jia, R.; Zhang, C.; Zhang, B. Electrochemical Synthesis of Nitric Acid from Air and Ammonia through Waste Utilization. *Natl. Sci. Rev.* 2019, **6**, 730.
- [2] Nørskov, J. K.; Rossmeisl, J.; Logadottir, A.; Lindqvist, L.; Kitchin, J. R.; Bligaard, T.; Jónsson, H.; Origin of the Overpotential for Oxygen Reduction at a Fuel-Cell Cathode, *J. Phys. Chem. B* 2004, **108**, 17886-17892.
- [3] M. Krack, M. Parrinello, All-electron ab-initio molecular dynamics, *J. Chem. Soc. Faraday Trans.*, 2000, **2**, 2105–2112.
- [4] A.D. Becke, A new mixing of Hartree–Fock and local density-functional theories, *J. Chem. Phys.* 1993, **98**, 1372–1377.
- [5] B. Delley, Hardness conserving semi local pseudopotentials, *Phys. Rev. B* 2002, **66**, 155125.
- [6] G. Di Liberto, L. Giordano, G. Pacchioni, Predicting the Stability of Single-Atom Catalysts in Electrochemical Reactions, *ACS Catal.* 2024, **14**, 45–55.
